# Supplementary material for: Transcriptome and Small RNA Sequencing Reveal the Mechanisms Regulating Harvest Index in Brassica napus
Source: Front Plant Sci. 2022 Apr 4;13:855486. doi: 10.3389/fpls.2022.855486 (PMC9014204; doi:10.3389/fpls.2022.855486)
Supplement: Supplementary file 6 [file Table_6.XLSX]

## Sheet: CQ_H vs L_30ZP
Table S6. Differentially expressed and potential target genes for the DE miRNAs identified in CQ_H vs L_30ZP
CQ_H vs L_30ZP
miRNA_Acc.	miR_regulate	Target_Acc.	Tar_regulate	Expectation	UPE	miRNA_start	miRNA_end	Target_start	Target_end	miRNA_aligned_fragment	Target_aligned_fragment	Inhibition	Target_Desc.	Description
bna-miR159	down	BnaA10g22560D	down	4	18.259	1	21	2728	2748	UUUGGAUUGAAGGGAGCUCUA	AAGAGUUUCUUUUAAUUCGAC	Cleavage	CDS=195-3218	ethylene induced calmodulin binding protein (EICBP.B)
bna-miR159	down	BnaA08g31440D	up	5	14.451	1	21	126	146	UUUGGAUUGAAGGGAGCUCUA	UAGAGCUUUCAUCAAUUCAUC	Translation	CDS=320-1117	FUNCTIONS IN: molecular_function unknown
bna-miR164a	down	BnaA02g31620D	down	3	20.136	1	21	194	214	UGGAGAAGCAGGGCACGUGCA	CUCACUUGCUCUGCUUCUUCC	Cleavage	CDS=62-4000	PHOSPHOGLUCAN WATER DIKINASE (PWD)
bna-miR164a	down	BnaA08g03450D	down	4.5	16.186	1	21	345	367	UGGAGAAG--CAGGGCACGUGCA	CGCACUUGCCUUGAACUUCUCCA	Cleavage	CDS=1-840	nodulin MtN21 /EamA-like transporter family protein
bna-miR164a	down	BnaA08g26300D	up	2.5	14.812	1	21	21	41	UGGAGAAGCAGGGCACGUGCA	GGCAUGUUCCUUGCUUCUCUA	Cleavage	CDS=143-802	germin-like protein 5 (GLP5)
bna-miR166e	down	BnaC03g41300D	down	4	17.425	1	21	3328	3348	UCGGACCAGGCUUCAUUCCCC	UGGAAGUGAAGUCUGGUCAGG	Cleavage	CDS=141-3542	myosin 1 (ATM1)
bna-miR167c	down	BnaA05g15360D	down	4	20.191	1	21	815	837	UGAAGCUGCCAGCAU--GAUCUA	UAGAUCCGAUUCUGGCAGCUUCA	Cleavage	CDS=97-1431	IAA-ALANINE RESISTANT 3 (IAR3)
bna-miR167c	down	BnaC03g69200D	up	3.5	15.302	1	21	464	484	UGAAGCUGCCAGCAUGAUCUA	UGGGUCGUGCUGUCGGCUUCU	Translation	CDS=46-588	Peptidase S24/S26A/S26B/S26C family protein
bna-miR172b	down	BnaAnng22170D	down	5	16.122	1	21	1059	1079	GGAAUCUUGAUGAUGCUGCAU	AUGUACUAUUAUCAAGAUUAA	Cleavage	CDS=98-1699	glycosyl hydrolase 9B5 (GH9B5)
bna-miR172b	down	BnaA02g31620D	down	3.5	13.927	1	21	2634	2655	GGAAUCUUG-AUGAUGCUGCAU	UUCCAGCAUCAUUCAAGGUUCC	Translation	CDS=62-4000	PHOSPHOGLUCAN WATER DIKINASE (PWD)
bna-miR390	down	BnaA07g30590D	down	4	20.421	1	21	853	873	AAGCUCAGGAGGGAUAGCGCC	GGCGGUGUCCCUCCUGAACUG	Cleavage	CDS=1-1815	Leucine-rich repeat family protein
bna-miR390	down	BnaA07g04740D	down	3	13.547	1	21	660	680	AAGCUCAGGAGGGAUAGCGCC	ACCGCCAUCUCUCCCGAGCUU	Cleavage	CDS=209-1771	ADP glucose pyrophosphorylase 1 (ADG1)
bna-miR394a	down	BnaA02g00450D	down	3.5	14.291	1	20	1856	1875	UUGGCAUUCUGUCCACCUCC	AGAGGUGGGAAGAGUGGCAA	Translation	CDS=151-1986	leucine-rich repeat transmembrane protein kinase family protein
bna-miR403	down	BnaC01g18740D	up	3.5	8.142	1	21	19	39	UUAGAUUCACGCACAAACUCG	UUUCUUUUUGUGUGAAUCUAA	Cleavage	CDS=117-362	#N/A
bna-miR403	down	BnaC02g12960D	up	4	17.358	1	21	143	163	UUAGAUUCACGCACAAACUCG	UGAGUUUAUGUGUUGAUUUGA	Cleavage	CDS=294-932	Excinuclease ABC, C subunit, N-terminal
bna-miR6034	up	BnaA06g10210D	down	4	20.977	1	21	1516	1536	UCUGAUGUAUAUAGCUUUGGG	CUCGCAGCUGUGUACGUUGGA	Cleavage	CDS=127-1959	ATNTT2
bna-miRA01_12750	up	BnaA05g01050D	up	4.5	12.311	1	24	247	270	CUGCUAUUGUAUGUGGUUUUCUGG	CGAGAAAGCCGUAUACGAUAACAA	Cleavage	CDS=207-1865	circadian clock associated 1 (CCA1)
bna-miRA01_12750	up	BnaC04g00590D	up	4.5	18.147	1	24	304	327	CUGCUAUUGUAUGUGGUUUUCUGG	CGAGGAAGCCGUAUACGAUAACAA	Cleavage	CDS=264-2522	circadian clock associated 1 (CCA1)
bna-miRA01_12750	up	BnaA04g04510D	up	4	17.773	1	24	1135	1159	CUGCUAUUGUAUG-UGGUUUUCUGG	AUGGAGAACAAACAUGCAAUAGCAG	Cleavage	CDS=1-1362	Regulator of chromosome condensation (RCC1) family protein
bna-miRA01_1294	up	BnaA01g26810D	down	3.5	20.952	1	24	362	385	CUUCGAUCUCUAGUCUGGACAACC	CUUUGUUGAGAGAAGAGAUCGAAG	Cleavage	CDS=1-546	Protein of unknown function (DUF1639)
bna-miRA02_10832	up	BnaC07g04320D	up	4	6.624	1	24	234	257	AUAUAUUCGAUGUGGGAUCUUCUC	ACCAAGAUCUCACAUUCAAUGAAU	Cleavage	CDS=1186-1662	#N/A
bna-miRA02_2282	up	BnaA06g21420D	down	3.5	18.52	1	21	344	364	AAGUAUGGUUUGAUGUGUGUG	UACACUCGGCGAGCCAUACUU	Cleavage	CDS=116-1924	signal recognition particle-related / SRP-related
bna-miRA02_2282	up	BnaA06g39650D	down	3.5	13.193	1	21	2478	2498	AAGUAUGGUUUGAUGUGUGUG	UCUGUAUGUCGAACCAUAUUU	Cleavage	CDS=88-2322	RECOGNITION OF PERONOSPORA PARASITICA 8 (RPP8)
bna-miRA02_2282	up	BnaA07g00140D	up	3.5	7.948	1	21	509	529	AAGUAUGGUUUGAUGUGUGUG	AAAACACAACAAGCUAUGCUU	Cleavage	CDS=1-837	unknown seed protein like 1 (USPL1)
bna-miRA02_4730	up	BnaA07g30590D	down	3.5	17.158	1	21	541	562	UCGGGUUGUUAUG-UUGACAUC	CAUGUUGAGCAUAACAACCUGA	Cleavage	CDS=1-1815	Leucine-rich repeat family protein
bna-miRA02_4730	up	BnaA09g40500D	down	4	14.547	1	21	1969	1990	UCGGGUUGUU-AUGUUGACAUC	GAUGACAACAUUGACAACUCGA	Translation	CDS=1-2199	1-phosphatidylinositol-4-phosphate 5-kinase 3 (PIP5K3)
bna-miRA02_9032	down	BnaA01g28900D	up	3.5	17.987	1	21	355	375	UUGGUAAGCCUCGAACCCAGG	UUUGUGAUCGAAGCUUACCGA	Translation	CDS=37-798	Aluminium induced protein with YGL and LRDR motifs
bna-miRA02_9032	down	BnaC06g05990D	up	3.5	15.782	1	21	319	339	UUGGUAAGCCUCGAACCCAGG	UUUGUGAUCGAAGCUUACCGA	Translation	CDS=1-762	Aluminium induced protein with YGL and LRDR motifs
bna-miRA02_9032	down	BnaA06g01730D	up	3.5	15.668	1	21	319	339	UUGGUAAGCCUCGAACCCAGG	UUUGUGAUCGAAGCUUACCGA	Translation	CDS=1-762	Aluminium induced protein with YGL and LRDR motifs
bna-miRA03_13555	up	BnaC08g28370D	down	4	22.706	1	23	654	676	AAAACGUGUGAACCUCUCUUCUA	UGGGAAGCAGGUUCACGCGUUUA	Cleavage	CDS=1-2646	ORGANELLE TRANSCRIPT PROCESSING 84 (OTP84)
bna-miRA03_13555	up	BnaC01g06520D	up	4.5	22.596	1	23	538	560	AAAACGUGUGAACCUCUCUUCUA	UGGCAGGGAUGUUCACAUGUUCC	Cleavage	CDS=113-715	unknown protein
bna-miRA03_14738	down	BnaC03g68730D	down	3.5	13.924	1	24	847	870	ACUAAAUCUCUUGACUGUAACUGC	GGAGUUACAGGUGGGGGAUUUGGU	Cleavage	CDS=1-1497	unknown protein
bna-miRA03_14738	down	BnaC03g42180D	down	5	15.091	1	24	79	102	ACUAAAUCUCUUGACUGUAACUGC	AGAGUUAUUGUCAGGAGGUUAAGG	Cleavage	CDS=1-1356	DNAse I-like superfamily protein
bna-miRA03_1511	up	BnaC03g15710D	down	5	17.107	1	24	604	627	AUUAUAUUCCGCUGAGAACACAUC	AAGGUGAUCUCAGUGGAGUAUGCA	Cleavage	CDS=136-1182	RNA-binding (RRM/RBD/RNP motifs) family protein
bna-miRA03_1978	down	BnaA07g07280D	down	3.5	17.654	1	24	389	412	CUUAAUUAUGGAGUUAGUGAGAAC	CAGCUCAUUAGGUACAUAAUUGAG	Translation	CDS=221-2599	SIT4 phosphatase-associated family protein
bna-miRA03_512	up	BnaCnng67360D	down	3.5	11.402	1	22	718	739	GGGUCGACAUGAGAACACAUGG	CCUUAUGUUCUUAUGUCGUCCU	Cleavage	CDS=1-693	#N/A
bna-miRA05_1859	down	BnaC01g04460D	down	4.5	13.931	1	24	558	581	AUAGACUAGAUUUUGACCCGUGCA	UUUGCGGGGAAAAAUCUGGUUUGA	Cleavage	CDS=53-1534	ECERIFERUM 4 (CER4)
bna-miRA05_7014	down	BnaC07g05770D	down	3.5	19.615	1	19	1010	1028	AGCCUGGCUCUGAUACCAU	AUGGUAACGAGGUCAGGCU	Translation	CDS=97-1050	Peroxidase superfamily protein
bna-miRA05_7014	down	BnaA07g03710D	down	3.5	19.255	1	19	1008	1026	AGCCUGGCUCUGAUACCAU	AUGGUAACGAGGUCAGGCU	Translation	CDS=95-1048	Peroxidase superfamily protein
bna-miRA05_7014	down	BnaA06g29980D	down	4.5	23.964	1	19	75	93	AGCCUGGCUCUGAUACCAU	AUGGUGUCGGGAUCAGGUA	Cleavage	CDS=75-695	Ribosomal protein L13 family protein
bna-miRA05_7014	down	BnaA03g26180D	up	3.5	13.035	1	19	1864	1882	AGCCUGGCUCUGAUACCAU	AUGGUUUUGAAGCUAGGCU	Translation	CDS=1-2094	Concanavalin A-like lectin protein kinase family protein
bna-miRA06_8332	up	BnaA03g07690D	up	3.5	17.231	1	24	1931	1954	AAAACCGUACUGCAGUUAAACCGC	GUGGAUUAAAUUCAGUACGGUUAU	Cleavage	CDS=1431-1853	Nucleic acid-binding, OB-fold-like protein
bna-miRA06_8332	up	BnaC04g30340D	up	4	17.567	1	24	615	638	AAAACCGUACUGCAGUUAAACCGC	CCCGUUUAACUGAGUUUUGGUUUU	Translation	CDS=85-504	HSP20-like chaperones superfamily protein
bna-miRA07_13132	up	BnaC04g14430D	up	3.5	16.374	1	24	414	437	GUAAAACGUGUGAACCUCUCUUCU	ACAACAGGGUUUCACAUCUUUUAC	Cleavage	CDS=1-219	#N/A
bna-miRA07_3373	up	BnaA09g42760D	up	4.5	10.812	1	21	1838	1858	CUAUCUAAAACUGGUUUAAUU	UAUUAAAUUGGUUUUCUAUAG	Cleavage	CDS=61-1593	myo-inositol-1-phosphate synthase 2 (MIPS2)
bna-miRA07_7094	up	BnaC01g00330D	down	5	18.14	1	24	878	901	AGAACCGUAUCUUAUCUGAAGCUA	CAGUUAUAUGUGAGAUAUGGUUCG	Cleavage	CDS=1-3210	cellulose synthase A2 (CESA2)
bna-miRA07_9292	up	BnaC01g15480D	down	4.5	16.545	1	21	639	659	AUCUUACGGACCUAGAUUGUG	AAUUGUCUGGUUCCGUAAGAC	Translation	CDS=56-511	Polyketide cyclase/dehydrase and lipid transport superfamily protein
bna-miRA07_9292	up	BnaC03g12430D	up	5	15.951	1	21	147	167	AUCUUACGGACCUAGAUUGUG	CACAGUUUGUGUCUGUGCGAU	Cleavage	CDS=169-1503	lactate/malate dehydrogenase family protein
bna-miRA07_9292	up	BnaC03g12430D	up	5	19.412	1	21	1459	1479	AUCUUACGGACCUAGAUUGUG	UGUGAUCUUGGUCCGGUAGAU	Cleavage	CDS=169-1503	lactate/malate dehydrogenase family protein
bna-miRA08_9856	up	BnaA10g04510D	down	5	13.331	1	24	699	722	UUUUGCGAAUGUACGAACAGAAUC	CAUUUUAUUUGUGCUUUUGUGAGA	Translation	CDS=1-609	CCT motif family protein
bna-miRAnn_random_39935	down	BnaA05g23270D	down	4.5	19.05	1	21	140	160	CAUGUGCCCAUCUUCCCCAUC	AAGGGGGAAGAUGGACGUAUA	Cleavage	CDS=56-862	alanine-tRNA ligases
bna-miRAnn_random_39935	down	BnaA07g23090D	up	3.5	19.714	1	21	182	202	CAUGUGCCCAUCUUCCCCAUC	CAUGGGGAAGAUGGGCGGCUG	Cleavage	CDS=1-666	HYPOXIA RESPONSIVE ERF (ETHYLENE RESPONSE FACTOR) 1 (HRE1)
bna-miRAnn_random_39935	down	BnaC01g17610D	up	3.5	18.768	1	21	590	610	CAUGUGCCCAUCUUCCCCAUC	UUUGGGCAAGAUGGGCUCAUA	Cleavage	CDS=133-1047	beta-hydroxylase 1 (BETA-OHASE 1)
bna-miRAnn_random_5359	up	BnaC04g06540D	up	3.5	19.573	1	21	817	837	UGAGUUAUCAUUGGUCUUGUG	UGUGAGGUCAAUGAUGACUCU	Cleavage	CDS=109-1419	Plant calmodulin-binding protein-related
bna-miRAnn_random_7668	up	BnaA07g38070D	down	4	21.029	1	24	654	677	AAGAACCGUCUCUUAGCUGAAAGU	UCUUUCAACUAAAAGAUGCUUCUU	Cleavage	CDS=175-1254	SKP1 interacting partner 4 (SKIP4)
bna-miRC01_11467	up	BnaA05g31340D	up	4.5	21.68	1	24	1964	1987	ACGGUCUCUUAGCUUUUAACUACG	CGACGUUAAAGAUUAAGAGACCAC	Cleavage	CDS=1-2064	long-chain acyl-CoA synthetase 6 (LACS6)
bna-miRC01_11467	up	BnaC05g45860D	up	4.5	22.406	1	24	1964	1987	ACGGUCUCUUAGCUUUUAACUACG	CGACGUUAAAGAUUAAGAGACCAC	Cleavage	CDS=1-2064	long-chain acyl-CoA synthetase 6 (LACS6)
bna-miRC01_11705	down	BnaCnng31310D	down	3.5	13.162	1	24	751	774	AUCGGAAUAUAAGAACCUGACUCU	UGCUUUAGGUUUUUAAGUUUUGAU	Translation	CDS=138-392	#N/A
bna-miRC01_11705	down	BnaCnng31310D	down	5	15.119	1	24	723	746	AUCGGAAUAUAAGAACCUGACUCU	AUCCGUAGGCUUUUAUGUUUUUAU	Cleavage	CDS=138-392	#N/A
bna-miRC01_11705	down	BnaCnng56320D	up	5	14.931	1	24	929	952	AUCGGAAUAUAAGAACCUGACUCU	AGGAUUGGGUGUUUGUAUUUCAAU	Cleavage	CDS=1-819	heat shock factor 4 (HSF4)
bna-miRC01_23272	up	BnaC03g77520D	up	4.5	12.919	1	24	959	982	AGAACCGGCUCUUAAAUAUCUAAG	GUUUGAUGUUUAAAACCUUGUUCU	Translation	CDS=38-844	unknown protein
bna-miRC02_1134	up	BnaA03g47290D	up	5	14.676	1	24	1612	1634	AAAAUCCGUCUGUUAACCUUUAAC	GUUAGGGGU-GAUGGAUGGGUUUU	Cleavage	CDS=375-1574	AT hook motif DNA-binding family protein
bna-miRC02_17420	up	BnaA08g09210D	down	4	15.887	1	24	2548	2571	AGAUGGGCUUCCAACUUAAAACUA	UGGUAUUAAACUGGAAGUCCAUUC	Cleavage	CDS=1-2109	nucleoside-triphosphatases
bna-miRC02_17420	up	BnaC07g04320D	up	5	17.276	1	24	1782	1805	AGAUGGGCUUCCAACUUAAAACUA	UGGUUUUGAGUUGAAAGCAUAACU	Translation	CDS=1186-1662	#N/A
bna-miRC02_30360	up	BnaA02g22590D	down	4	15.458	1	21	923	943	CAGCGAAGCGUGUUGGAACCC	UGGUUGGAGCACGUUUUGUUG	Cleavage	CDS=31-1227	tetraacyldisaccharide 4'-kinase family protein
bna-miRC02_6475	down	BnaC01g16200D	up	3	14.674	1	24	1989	2012	AUAGACCGAUCGAUCUGUGGAAGC	AGUAAUGCAGAUCGGUCAGUCUAU	Cleavage	CDS=1-2139	chloroplast heat shock protein 70-1 (cpHsc70-1)
bna-miRC03_111	up	BnaAnng19160D	down	3.5	17.688	1	24	1196	1219	UUAACUUCCGCUAAGAACUUCAUU	AAUGGAGUUUUCGGCGUGAGUUAA	Cleavage	CDS=1-2937	#N/A
bna-miRC03_111	up	BnaC03g41300D	down	3	17.067	1	24	3314	3337	UUAACUUCCGCUAAGAACUUCAUU	UGCGAAGUUUUUGGUGGAAGUGAA	Cleavage	CDS=141-3542	myosin 1 (ATM1)
bna-miRC03_24358	up	BnaC03g28860D	up	2.5	13.631	1	24	374	397	AAUACGGUCUCUUAACUUUUAACU	GGCACAGAGUUGAGAGAUCGUAUG	Cleavage	CDS=1-594	ATHSP22.0
bna-miRC03_27293	down	BnaA06g20500D	up	5	16.458	1	24	251	274	AAAACUGUGUGAACUCCUCUUGGA	UCUACGAUGAGUUCAUGUACUUUG	Cleavage	CDS=1-1320	UDP-glucosyl transferase 76E11 (UGT76E11)
bna-miRC03_28952	up	BnaA02g05110D	down	5	16.176	1	24	697	720	AGUGUAGAACCUCUAUCCAAAAGU	AUUUUUGGAUGAAGGAUUUAUUCU	Translation	CDS=77-1660	TCP-1/cpn60 chaperonin family protein
bna-miRC03_28952	up	BnaC03g41300D	down	4.5	14.707	1	24	1925	1948	AGUGUAGAACCUCUAUCCAAAAGU	GCUUUUGGAUGAGGAAUCUACAUU	Translation	CDS=141-3542	myosin 1 (ATM1)
bna-miRC03_28952	up	BnaA08g31440D	up	5	14.446	1	24	207	231	AGUGUAGAAC-CUCUAUCCAAAAGU	UUUUUGGGAUAGAGUGUUCUGAACU	Translation	CDS=320-1117	FUNCTIONS IN: molecular_function unknown
bna-miRC03_32296	up	BnaAnng19160D	down	4.5	17.688	1	24	1196	1219	UUAACUUCCGAUAAGAACUCCACU	AAUGGAGUUUUCGGCGUGAGUUAA	Translation	CDS=1-2937	#N/A
bna-miRC03_52	up	BnaC08g32460D	down	5	21.127	1	21	472	492	AGGAACUGGUAAUCUGCAUCC	GGAUCCAGGUUACCUGUUUUC	Cleavage	CDS=1-1086	beta glucosidase 10 (BGLU10)
bna-miRC03_52	up	BnaC07g39100D	down	4	13.001	1	21	876	896	AGGAACUGGUAAUCUGCAUCC	ACAUGCAGAUUACUAUUGCUU	Cleavage	CDS=77-1297	Pectin lyase-like superfamily protein
bna-miRC03_52	up	BnaA06g21420D	down	4.5	16.319	1	21	926	946	AGGAACUGGUAAUCUGCAUCC	GGCUACAGAUUUCCAGUUUCC	Translation	CDS=116-1924	signal recognition particle-related / SRP-related
bna-miRC03_52	up	BnaC01g43360D	up	3.5	14.895	1	21	564	584	AGGAACUGGUAAUCUGCAUCC	UGAUGCAGCUUAACACUUCCU	Translation	CDS=168-449	#N/A
bna-miRC03_52	up	BnaCnng75490D	up	4.5	18.878	1	21	432	452	AGGAACUGGUAAUCUGCAUCC	CCAUGCAGAUUACUUGUUCAC	Cleavage	CDS=265-744	nitrilase 2 (NIT2)
bna-miRC03_53058	up	BnaC08g41300D	down	3.5	16.193	1	24	558	581	CUAAGAACUCCGAGUUAAUCAUGG	GAGAGAUGAACUUGGAGUUUUUUG	Cleavage	CDS=122-2125	keule (KEU)
bna-miRC03_53058	up	BnaA01g16840D	down	3.5	21.125	1	24	1046	1069	CUAAGAACUCCGAGUUAAUCAUGG	CUUUUAGUAGUUCGGAGCUCUUAG	Cleavage	CDS=1-1086	nodulin MtN21 /EamA-like transporter family protein
bna-miRC03_98	up	BnaC03g41300D	down	2.5	14.687	1	24	3312	3335	AACUUCCGCUAAGAACUUCAUUCU	GAUGCGAAGUUUUUGGUGGAAGUG	Cleavage	CDS=141-3542	myosin 1 (ATM1)
bna-miRC03_98	up	BnaAnng19160D	down	4.5	17.283	1	24	1194	1217	AACUUCCGCUAAGAACUUCAUUCU	GAAAUGGAGUUUUCGGCGUGAGUU	Translation	CDS=1-2937	#N/A
bna-miRC04_21214	down	BnaC03g65070D	down	4.5	15.155	1	21	317	337	AUCAUGCUAUCCCUUUCGAUU	AAUCGAAGGUGGUGGUCUGAU	Cleavage	CDS=336-533	#N/A
bna-miRC04_21214	down	BnaC03g65070D	down	5	14.733	1	21	296	316	AUCAUGCUAUCCCUUUCGAUU	AAUCGAAGGUGGUGGUGUUAU	Cleavage	CDS=336-533	#N/A
bna-miRC04_21214	down	BnaCnng26280D	down	5	17.812	1	21	703	723	AUCAUGCUAUCCCUUUCGAUU	GAUUGAGAGGGAGAGAAUGGG	Translation	CDS=719-1054	SPIRAL1-like1 (SP1L1)
bna-miRC04_21214	down	BnaA01g01000D	up	4.5	18.434	1	21	990	1010	AUCAUGCUAUCCCUUUCGAUU	AAUUGAAUGGGAUAGUAUCAA	Cleavage	CDS=1-1182	PQ-loop repeat family protein / transmembrane family protein
bna-miRC04_29081	up	BnaC05g08160D	down	4	18.45	1	19	729	747	GCUCGGGAGUUGUGUUUCU	AGGAACGCAACUCUUCAGU	Cleavage	CDS=377-1396	SBP (S-ribonuclease binding protein) family protein
bna-miRC04_29081	up	BnaA08g25340D	down	4	15.355	1	19	800	818	GCUCGGGAGUUGUGUUUCU	AGGGACACAACUUUCGGAC	Cleavage	CDS=170-1831	MILDEW RESISTANCE LOCUS O 2 (MLO2)
bna-miRC04_29081	up	BnaCnng63320D	up	3	12.657	1	19	62	80	GCUCGGGAGUUGUGUUUCU	AGAAGCAGAACUCCCAAGC	Cleavage	CDS=1-276	#N/A
bna-miRC04_32039	up	BnaA03g51810D	down	3.5	14.438	1	24	1354	1377	AUUGUAGGUCUUUUAGGUUGAAUU	CCUUUAAUGUGGAAGACCUAUGAU	Cleavage	CDS=1-1956	PICKLE (PKL)
bna-miRC04_33237	down	BnaA06g07580D	down	5	18.699	1	24	2747	2770	CAUCCCAACUGCAUAAUUUACUGC	UUAGUAAAUUAUCCGAUUAGGAUU	Translation	CDS=253-2580	OSBP(oxysterol binding protein)-related protein 1D (ORP1D)
bna-miRC04_33237	down	BnaA08g25340D	down	3.5	18.429	1	24	347	369	CAUCCCAACUGCAUAAUUUACUGC	GCAG-AGCUUAUGCUGUUGGGAUU	Translation	CDS=170-1831	MILDEW RESISTANCE LOCUS O 2 (MLO2)
bna-miRC04_33237	down	BnaA01g28260D	up	3	21.632	1	24	708	731	CAUCCCAACUGCAUAAUUUACUGC	GGCGUUGAUGAUGCAGUUGGGGUG	Cleavage	CDS=1-915	pyridoxine biosynthesis 1.2 (PDX1.2)
bna-miRC04_5516	up	BnaA03g29550D	down	5	15.861	1	23	549	571	ACGGUCUUUUAGCUUUUAACUUA	AAAGUUAAAGUCUAAAAGGCUCA	Cleavage	CDS=1-1236	PAPA-1-like family protein / zinc finger (HIT type) family protein
bna-miRC04_5516	up	BnaA09g34660D	down	3	21.068	1	23	116	138	ACGGUCUUUUAGCUUUUAACUUA	AGAUUUGGAAGCUGGAGGAUCGU	Cleavage	CDS=1-1641	unknown protein
bna-miRC04_6329	down	BnaA04g11150D	down	5	21.361	1	22	1069	1090	CAACGGAACGACUUAGUAGAAG	CUUCCAUUAGGUCUUUGUGUUG	Translation	CDS=1-2889	Disease resistance protein (TIR-NBS-LRR class) family
bna-miRC05_39084	down	BnaC09g21260D	down	4.5	17.365	1	22	764	785	UUAUAGGUUGUCGGUUUUGAUU	AAUCGAAGAUGAGAGCUUAUAA	Translation	CDS=349-1404	indole-3-acetic acid inducible 9 (IAA9)
bna-miRC06_11485	up	BnaC01g38510D	up	3.5	24.606	1	23	419	441	GUUUCGGCUAAGAACUGUUUCUU	GAGAAACAGUUCUCAGCUGAGGA	Translation	CDS=77-2020	heat shock protein 70 (HSP70)
bna-miRC06_11485	up	BnaA01g30490D	up	4	18.118	1	23	415	437	GUUUCGGCUAAGAACUGUUUCUU	GAGAAACAGUUCUCAGCGGAAGA	Translation	CDS=73-2025	heat shock protein 70 (HSP70)
bna-miRC06_11485	up	BnaCnng18290D	up	3.5	15.819	1	23	2458	2480	GUUUCGGCUAAGAACUGUUUCUU	UCGGGACAGUUCAUAGUCCAAAC	Translation	CDS=1-2961	cellulose synthase-like D3 (CSLD3)
bna-miRC06_3193	down	BnaC03g42180D	down	4.5	11.151	1	21	1241	1261	GCAAGUUGACUUUGGCUCUGU	AUAUAGUCAAAGUCGACUUAG	Cleavage	CDS=1-1356	DNAse I-like superfamily protein
bna-miRC06_3193	down	BnaCnng27470D	down	3.5	14.908	1	21	389	409	GCAAGUUGACUUUGGCUCUGU	AUAAAGCCAAACUCAACUUCC	Translation	CDS=1-738	ethylene-responsive element binding protein (EBP)
bna-miRC06_3193	down	BnaAnng19730D	down	3	15.242	1	21	1947	1967	GCAAGUUGACUUUGGCUCUGU	CUAGAGCCAAACGCAACUUGA	Translation	CDS=81-1709	ROTUNDIFOLIA 3 (ROT3)
bna-miRC06_3193	down	BnaC06g05390D	up	5	18.32	1	21	96	116	GCAAGUUGACUUUGGCUCUGU	ACAUAGCCAGAGUAAACUUAA	Cleavage	CDS=1-699	HSP20-like chaperones superfamily protein
bna-miRC06_5157	up	BnaC07g05560D	up	4	18.872	1	21	2457	2477	CAUCCAGCUGGAAGACUUUCU	AGAAAGUCUUGGAACUGGAUC	Translation	CDS=1087-3243	unknown protein
bna-miRC06_6366	down	BnaA07g14320D	down	5	17.855	1	22	655	676	CCACCCAUACCAUACAGACCCU	UUGGUCCUUAUGGUGUGGGUUU	Cleavage	CDS=160-606	outer plastid envelope protein 16-1 (OEP16-1)
bna-miRC06_696	up	BnaC07g27370D	down	3	14.7	1	20	1517	1536	GCUUGUGGUUCGACCUCUCU	CGUGUGGUCGAGUCACAAGC	Cleavage	CDS=351-2039	unknown protein
bna-miRC06_8733	up	BnaAnng19160D	down	3	16.642	1	24	1123	1146	AUAUUCCGAUAAGAACUUCACUCU	UUGAUGAAGUUUUUGUUGGAAUGG	Cleavage	CDS=1-2937	#N/A
bna-miRC06_8733	up	BnaA07g30590D	down	5	21.001	1	24	1139	1162	AUAUUCCGAUAAGAACUUCACUCU	CGGGUGAGAUUCCUAUUGAGAUAU	Cleavage	CDS=1-1815	Leucine-rich repeat family protein
bna-miRC06_random_2262	up	BnaC04g52510D	up	2.5	16.188	1	24	2060	2083	AGAGCCGACUCUUAACUUUUUCAG	AGUACAGAGAUGAGAGUUGGCUCU	Cleavage	CDS=86-2131	MORE AXILLARY BRANCHES 2 (MAX2)
bna-miRC07_13213	up	BnaA06g36030D	down	4	18.295	1	19	1246	1264	AUCCAAAUGAUCUAUCUGA	ACAUAUGGAUCAUUGGGAU	Cleavage	CDS=231-1838	O-acetyltransferase family protein
bna-miRC07_13213	up	BnaA01g01460D	down	4	15.494	1	19	1029	1047	AUCCAAAUGAUCUAUCUGA	UCAGAUAAAUCAUGUGUAU	Cleavage	CDS=1-4290	disease resistance protein (TIR-NBS-LRR class), putative
bna-miRC07_13213	up	BnaA06g32050D	up	3.5	14.064	1	19	1200	1218	AUCCAAAUGAUCUAUCUGA	GAAGAUAGGACAUUUGGAU	Translation	CDS=1-1566	cytochrome P450, family 709, subfamily B, polypeptide 3 (CYP709B3)
bna-miRC07_13213	up	BnaA07g30580D	up	3.5	17.746	1	19	918	936	AUCCAAAUGAUCUAUCUGA	UCAGAUGGUUCAUUUGCGU	Translation	CDS=45-1115	Low PSII Accumulation 3 (LPA3)
bna-miRC08_10778	up	BnaC01g30760D	down	4.5	4.405	1	24	971	994	AACUUCCGCUAAGAACCUCAUCUU	AAGGAGGGGGUUUUGGUGGAGGUG	Cleavage	CDS=1-1083	unknown protein
bna-miRC08_28600	down	BnaA09g32150D	up	4.5	16.287	1	24	988	1011	AGAUACGGUCUAUUAGUUUUUAAC	AUUAGAAGUUCAUAAACUGUAUCA	Translation	CDS=1-339	#N/A
bna-miRC08_5718	down	BnaC02g04730D	up	2.5	16.561	1	24	1248	1271	AGACUCUCGGAAGACUUCUAGACA	GUUCAAGAAGAGUUUCGAGAGUCU	Cleavage	CDS=1-1323	Aldolase-type TIM barrel family protein
bna-miRC08_5718	down	BnaC03g05240D	up	4.5	10.76	1	24	5	28	AGACUCUCGGAAGACUUCUAGACA	AAUUUGUAAGGUUUCCGAUAGUCU	Cleavage	CDS=1-465	17.6 kDa class II heat shock protein (HSP17.6II)
bna-miRC08_5718	down	BnaA03g03740D	up	4.5	10.76	1	24	5	28	AGACUCUCGGAAGACUUCUAGACA	AAUUUGUAAGGUUUCCGAUAGUCU	Cleavage	CDS=1-465	17.6 kDa class II heat shock protein (HSP17.6II)
bna-miRC09_15069	up	BnaAnng19160D	down	4	17.283	1	24	1194	1217	AACUUCCGCUAAGAACUCCAUUCU	GAAAUGGAGUUUUCGGCGUGAGUU	Translation	CDS=1-2937	#N/A
bna-miRC09_30290	down	BnaC02g26790D	up	4.5	10.643	1	24	483	506	AUGCACGGUUUAGAAUUCAAGUCU	UGUCUUGGAUUCGGAACUUUGUAU	Cleavage	CDS=1-522	#N/A
bna-miRC09_33395	down	BnaA01g01460D	down	2	20.552	1	24	3462	3485	AUAAAGAUCUUGUAUUUCCUCUUA	UGCUUGGAAAUACGACGUCUUUAU	Translation	CDS=1-4290	disease resistance protein (TIR-NBS-LRR class), putative
bna-miRC09_41441	up	BnaAnng19160D	down	4	17.283	1	24	1194	1217	AACUUCCGCUAAGAACUCCACUUU	GAAAUGGAGUUUUCGGCGUGAGUU	Translation	CDS=1-2937	#N/A
bna-miRC09_41441	up	BnaC01g30760D	down	4.5	4.405	1	24	971	994	AACUUCCGCUAAGAACUCCACUUU	AAGGAGGGGGUUUUGGUGGAGGUG	Cleavage	CDS=1-1083	unknown protein
bna-miRC09_41441	up	BnaA02g32040D	up	5	16.827	1	24	16	38	AACUUCCGCUAAGAACUCCACUUU	AAGGUCGAGUUUUUA-CGGAAGCU	Translation	CDS=1-303	#N/A
bna-miRC09_7003	up	BnaC09g49940D	down	5	13.304	1	24	1601	1624	CCGAACUAUGACCUCAUUCUAAAU	AUAUAAAAUGGGGUCUUGGUAUGG	Translation	CDS=1-1698	laccase 12 (LAC12)
bna-miRC09_7003	up	BnaCnng49370D	up	4	18.17	1	24	787	810	CCGAACUAUGACCUCAUUCUAAAU	AGUAAGCAUGAGGGUAUAGUUUGU	Translation	CDS=1-1500	#N/A
bna-miRCnn_random_55590	up	BnaCnng64850D	up	3	22.26	1	21	1106	1126	AACCGGUUCUUAACUUUUUAG	ACAAAGGGUUUAGAACCGGUG	Translation	CDS=1-1221	isopropylmalate dehydrogenase 1
bna-miRCnn_random_86274	up	BnaUnng04820D	down	3.5	22.728	1	21	466	486	AUCCUCGGGACACAGAUUACC	ACUACUCUGUCUCUCGAGGAG	Translation	CDS=310-843	#N/A

## Sheet: YN_H vs L_30ZP
Table S6. Differentially expressed and potential target genes for the DE miRNAs identified in YN_H vs L_30ZP
CQ_H vs L_30ZP
miRNA_Acc.	miR_regulate	Target_Acc.	Tar_regulate	Expectation	UPE	miRNA_start	miRNA_end	Target_start	Target_end	miRNA_aligned_fragment	Target_aligned_fragment	Inhibition	Target_Desc.	Description
bna-miR159	down	BnaA10g22560D	down	4	18.259	1	21	2728	2748	UUUGGAUUGAAGGGAGCUCUA	AAGAGUUUCUUUUAAUUCGAC	Cleavage	CDS=195-3218	ethylene induced calmodulin binding protein (EICBP.B)
bna-miR159	down	BnaCnng27780D	up	4.5	17.215	1	21	642	663	UUUGGAU-UGAAGGGAGCUCUA	AAGAGUUUCCUUCAGAUCCGAA	Cleavage	CDS=56-2683	pyruvate orthophosphate dikinase (PPDK)
bna-miR171a	down	BnaA02g33040D	up	4.5	17.727	1	21	981	1001	UUGAGCCGUGCCAAUAUCACG	CGAGGUAUUCUCACGGUUCAG	Translation	CDS=1-1158	methylthioalkylmalate synthase 1 (MAM1)
bna-miR390	down	BnaA08g01780D	down	5	21.326	1	21	1796	1816	AAGCUCAGGAGGGAUAGCGCC	GGUGUUGUUCUUUUUGAGAUU	Cleavage	CDS=170-2167	protein kinase family protein / peptidoglycan-binding LysM domain-containing protein
bna-miR395a	down	BnaC09g46440D	up	1.5	18.352	1	21	104	124	CUGAAGUGUUUGGGGGAACUC	AAGUUCUCCCAAACACUUCAA	Cleavage	CDS=64-2094	slufate transporter 2
bna-miR395a	down	BnaA09g52790D	up	3.5	11.962	1	21	159	179	CUGAAGUGUUUGGGGGAACUC	AAGUUUCCCAAAAGACUUCAU	Cleavage	CDS=37-1641	thioglucoside glucohydrolase 1 (TGG1)
bna-miR396	down	BnaA06g21030D	down	4	16.334	1	21	1557	1577	UUCCACAGCUUUCUUGAACUU	AGGUUCGGGAAGGCAGUGGAU	Cleavage	CDS=655-1482	SER/ARG-rich protein 34A (SRp34a)
bna-miR396	down	BnaC02g30040D	down	4	22.787	1	21	513	533	UUCCACAGCUUUCUUGAACUU	AAGAUCAGGGAAGCUGCGGGA	Cleavage	CDS=56-1438	Granulin repeat cysteine protease family protein
bna-miR396	down	BnaC01g34010D	up	3	20.518	1	21	109	129	UUCCACAGCUUUCUUGAACUU	GUCUUCAAGAAAGCUGAGGAG	Cleavage	CDS=1-870	AGAMOUS-like 103 (AGL103)
bna-miRA02_18667	down	BnaC07g46420D	up	3	14.735	1	24	410	433	AAAACGAUUUGAUUGGCUGGAAUU	GUUUGCAGCCAAAGAAAUCGUUUC	Translation	CDS=132-1370	PATATIN-like protein 4 (PLP4)
bna-miRA03_11110	down	BnaCnng20610D	down	3	20.16	1	21	2900	2920	UCAGUGAUCAUUGUAGUUGUU	AACAACUACAGUGUUUGUUGA	Cleavage	CDS=24-2936	limit dextrinase (LDA)
bna-miRA03_11110	down	BnaC05g43400D	down	3	9.644	1	21	907	927	UCAGUGAUCAUUGUAGUUGUU	AACAACUACACUCGUCACUGG	Translation	CDS=175-1269	Pectin lyase-like superfamily protein
bna-miRA03_11110	down	BnaCnng64850D	up	3	23.783	1	21	879	899	UCAGUGAUCAUUGUAGUUGUU	UGAAGCUUCAAUGAUCACUGG	Cleavage	CDS=1-1221	isopropylmalate dehydrogenase 1
bna-miRA03_11110	down	BnaC02g01960D	up	3.5	23.157	1	21	229	249	UCAGUGAUCAUUGUAGUUGUU	GACGACUCCGACGAUCACUGG	Translation	CDS=104-2362	ABC-2 type transporter family protein
bna-miRA03_14644	up	BnaA06g12190D	up	4	15.242	1	24	1486	1509	AGAGAUUUUUGUUAUUGUUAACUA	CAGUUUACAAUGAGAGAGAUCUUU	Translation	CDS=150-1367	Endosomal targeting BRO1-like domain-containing protein
bna-miRA03_1511	up	BnaC04g49530D	up	5	14.873	1	24	1468	1491	AUUAUAUUCCGCUGAGAACACAUC	GAGGUGGUUGCGGCGGAGUAUGAA	Cleavage	CDS=1-1716	Plant protein of unknown function (DUF946)
bna-miRA03_random_2785	down	BnaC08g26510D	up	3.5	22.007	1	24	1152	1175	CCACAACUAGUGUAUAACUCUACU	UGGCCAGUUAGGUACUGGUUGUGA	Cleavage	CDS=1-1443	Regulator of chromosome condensation (RCC1) family protein
bna-miRA07_12065	up	BnaC07g44650D	down	3.5	12.51	1	21	754	774	UUGUUCAUCACUUCAUUUCCC	AGGAAGUGAAGUGGAGAAUGA	Cleavage	CDS=1-711	FUNCTIONS IN: molecular_function unknown
bna-miRA07_12065	up	BnaC09g05250D	down	4	21.454	1	21	804	824	UUGUUCAUCACUUCAUUUCCC	GGCCAAUGAGGUGAUCAACAA	Cleavage	CDS=1-1506	TIMING OF CAB EXPRESSION 1 (TOC1)
bna-miRA07_4294	up	BnaCnng09450D	down	4.5	18.512	1	21	665	685	GAUCCUCUGAACACUUCAUUG	CAAUGGAGUGUAUAGAGCAUA	Translation	CDS=1-1104	BTB and TAZ domain protein 2 (BT2)
bna-miRA07_4294	up	BnaC05g37230D	up	3.5	13.337	1	21	1004	1024	GAUCCUCUGAACACUUCAUUG	UAAUGGGAUGUUUAGAGGAUG	Cleavage	CDS=93-1067	N-terminal nucleophile aminohydrolases (Ntn hydrolases) superfamily protein
bna-miRA07_4294	up	BnaA05g23530D	up	3.5	13.381	1	21	1003	1023	GAUCCUCUGAACACUUCAUUG	UAAUGGGAUGUUUAGAGGAUG	Cleavage	CDS=92-1066	N-terminal nucleophile aminohydrolases (Ntn hydrolases) superfamily protein
bna-miRA07_6247	up	BnaC06g13300D	up	4.5	16.754	1	24	2066	2089	AAGAACCGUAUCUUAUCUGAAGCU	AGUUUUGAAAAAGAGAUGGUUCUU	Translation	CDS=138-2450	chloride channel A (CLC-A)
bna-miRA07_7094	up	BnaC06g13300D	up	4.5	16.775	1	24	2065	2088	AGAACCGUAUCUUAUCUGAAGCUA	AAGUUUUGAAAAAGAGAUGGUUCU	Translation	CDS=138-2450	chloride channel A (CLC-A)
bna-miRA08_4557	up	BnaA05g28930D	down	3.5	18.253	1	21	1060	1080	CUUGGUGCAGGUCGGGAACCA	UGGUUCUUGAACGGCGCCAAG	Translation	CDS=151-1245	Pectin lyase-like superfamily protein
bna-miRA08_4557	up	BnaC05g43400D	down	3.5	23.555	1	21	1084	1104	CUUGGUGCAGGUCGGGAACCA	UGGUUCUUGAACGGCGCCAAG	Translation	CDS=175-1269	Pectin lyase-like superfamily protein
bna-miRA08_4850	down	BnaC03g46060D	down	3	13.453	1	23	1158	1179	AUCUUCUAGAUCUCUUGGCUAUG	AUUAGCCAAGA-AUUUAGAGGAU	Cleavage	CDS=1-1680	POLLEN-PISTIL INCOMPATIBILITY 2 (POP2)
bna-miRA08_9396	down	BnaCnng27470D	down	3.5	18.624	1	21	388	408	CAAGUUGACUUUGGCUCUGUU	GAUAAAGCCAAACUCAACUUC	Translation	CDS=1-738	ethylene-responsive element binding protein (EBP)
bna-miRA09_2253	down	BnaA07g28910D	down	4.5	15.758	1	24	1579	1602	CGGAUCUGGUAAAAUGUUCAUAUC	CGGAUGAAUAUUUUGUCGGAGCCA	Cleavage	CDS=145-1992	phosphoglucomutase, putative / glucose phosphomutase, putative
bna-miRA09_2253	down	BnaC06g31970D	down	4.5	15.942	1	24	1510	1533	CGGAUCUGGUAAAAUGUUCAUAUC	CGGAUGAAUAUUUUGUCGGAGCCA	Cleavage	CDS=76-1923	phosphoglucomutase, putative / glucose phosphomutase, putative
bna-miRA09_random_579	up	BnaA09g06500D	down	5	14.815	1	24	93	116	AUGGAGUGGGAAAUGAAGUAGGGU	UCUCUACUGCAUUUUCUUCUCCGC	Cleavage	CDS=1-1287	Pectin lyase-like superfamily protein
bna-miRA09_random_579	up	BnaA01g19110D	up	2.5	7.955	1	22	1	22	AUGGAGUGGGAAAUGAAGUAGG	ACUACUUCUCUUCCUACUCCAU	Cleavage	CDS=42-617	EARLY LIGHT-INDUCIBLE PROTEIN 2 (ELIP2)
bna-miRAnn_random_2264	up	BnaC09g40660D	up	3	19.07	1	23	847	869	AAAACUGUGUAACCAAUUAGAUA	AGACUCUUUGGUAACACAGUUUU	Translation	CDS=271-1173	REVEILLE 1 (RVE1)
bna-miRAnn_random_39935	down	BnaA07g01250D	down	4	21.831	1	21	892	912	CAUGUGCCCAUCUUCCCCAUC	GGCGGGGAAGGUGUGAACAUG	Cleavage	CDS=1-1824	LOV KELCH protein 2 (LKP2)
bna-miRAnn_random_39935	down	BnaAnng29440D	up	5	22.687	1	21	1491	1511	CAUGUGCCCAUCUUCCCCAUC	GGUGGGGGAGAAGGGUGCACU	Translation	CDS=1315-1557	#N/A
bna-miRAnn_random_39935	down	BnaC01g17610D	up	3.5	18.768	1	21	590	610	CAUGUGCCCAUCUUCCCCAUC	UUUGGGCAAGAUGGGCUCAUA	Cleavage	CDS=133-1047	beta-hydroxylase 1 (BETA-OHASE 1)
bna-miRAnn_random_7722	up	BnaC03g74630D	up	3.5	11.73	1	24	1953	1976	ACUUGGUAAAACUGUAUAACUAGG	UAUUGUUGUUCAGUUUUACUUAGU	Cleavage	CDS=114-1751	MATE efflux family protein
bna-miRC01_19092	down	BnaC09g43920D	up	5	13.821	1	24	1020	1043	UACAUGUAACUCGUCGGGCGGACG	AAUCUGUCUGAUGUGUCAAAUGUA	Translation	CDS=134-1030	senescence-associated gene 29 (SAG29)
bna-miRC01_19171	up	BnaA01g26770D	down	4	20.228	1	24	2051	2074	AUAUUCCGAUAAGAACUCCAUUCU	GCGGUGGAGUUCUUGUGGCAAUAG	Cleavage	CDS=1-2421	embryo defective 1865 (EMB1865)
bna-miRC02_1134	up	BnaC08g14490D	down	5	14.073	1	24	960	982	AAAAUCCGUCUGUUAACCUUUAAC	ACUAAAGGUUA-CAGACUGAGUUU	Cleavage	CDS=60-1286	unknown protein
bna-miRC02_1134	up	BnaA03g47290D	up	5	14.676	1	24	1612	1634	AAAAUCCGUCUGUUAACCUUUAAC	GUUAGGGGU-GAUGGAUGGGUUUU	Cleavage	CDS=375-1574	AT hook motif DNA-binding family protein
bna-miRC02_22080	down	BnaA06g25030D	down	3	19.461	1	21	275	295	UCAAUGUUGGCUCAAUUAUGU	UCAUAAUUGAGUUAAUUUUGA	Cleavage	CDS=380-1522	BTB and TAZ domain protein 4 (BT4)
bna-miRC02_22080	down	BnaC06g15270D	up	3.5	18.55	1	21	483	503	UCAAUGUUGGCUCAAUUAUGU	GUAUGGAUGGGCUAACAUUGG	Cleavage	CDS=100-1743	FUNCTIONS IN: molecular_function unknown
bna-miRC02_58469	up	BnaC08g32430D	up	2.5	14.562	1	21	238	258	AAUCUCCCAUUAAACAUGCUC	UUGCAUGGUUAUUGGGGGAUU	Translation	CDS=1-579	xylosyltransferase 1 (XT1)
bna-miRC02_58469	up	BnaC06g30180D	up	5	15.547	1	21	1711	1731	AAUCUCCCAUUAAACAUGCUC	GAGUAUUUUUACUGGGUGAUC	Translation	CDS=91-1869	Major facilitator superfamily protein
bna-miRC03_10018	down	BnaC03g02030D	down	4	16.293	1	24	724	747	AACAUCCGCUAAGAACUUCAUUCU	GGGAUGAAGUUGAUAAAGGAUGUU	Translation	CDS=1-1548	Cytochrome P450 superfamily protein
bna-miRC03_27293	up	BnaA06g20500D	up	5	16.458	1	24	251	274	AAAACUGUGUGAACUCCUCUUGGA	UCUACGAUGAGUUCAUGUACUUUG	Cleavage	CDS=1-1320	UDP-glucosyl transferase 76E11 (UGT76E11)
bna-miRC03_52	up	BnaCnng75490D	up	4.5	18.878	1	21	432	452	AGGAACUGGUAAUCUGCAUCC	CCAUGCAGAUUACUUGUUCAC	Cleavage	CDS=265-744	nitrilase 2 (NIT2)
bna-miRC04_50487	up	BnaC03g46120D	down	3.5	18.578	1	24	1652	1675	CUAAGAACUCUGGGUUAAUCAUGG	AUGUGAUUGAUCCAGCGUUCUUGA	Translation	CDS=1-2088	cell division cycle 48C (CDC48C)
bna-miRC04_50487	up	BnaC03g74060D	up	5	22.078	1	24	638	661	CUAAGAACUCUGGGUUAAUCAUGG	UUGUGGAUAACCCUGAGUUCUUCA	Translation	CDS=1-2247	acyl activating enzyme 16 (AAE16)
bna-miRC04_5516	up	BnaA10g03720D	up	2.5	23.092	1	23	855	877	ACGGUCUUUUAGCUUUUAACUUA	UCUCAUAGAAGGUAAAAGACCGU	Cleavage	CDS=1-1419	UDP-glucosyltransferase 75B1 (UGT75B1)
bna-miRC05_11627	down	BnaC03g37520D	up	3	18.554	1	20	471	490	UUUGGUAAUGGAGCAUGGUC	CCCCAUGUUCCAUUGUCAAG	Cleavage	CDS=109-903	unknown protein
bna-miRC05_11627	down	BnaC03g37520D	up	4.5	15.919	1	20	1138	1157	UUUGGUAAUGGAGCAUGGUC	CAUCAUGUUUCAUUAUGAAC	Cleavage	CDS=109-903	unknown protein
bna-miRC05_11627	down	BnaA03g32230D	up	3.5	19.022	1	20	475	494	UUUGGUAAUGGAGCAUGGUC	CCCUAUGUUCCAUUGUCAAG	Cleavage	CDS=110-907	unknown protein
bna-miRC05_12770	down	BnaC01g40960D	down	3	18.502	1	24	757	780	AACUAGGACUGUAUUAAUAAAUGC	GUCUAAGUUAUUACAGUCCUGGUU	Cleavage	CDS=194-1051	unknown protein
bna-miRC05_576	down	BnaC03g46120D	down	3.5	18.578	1	24	1652	1675	UUAAGAACUCCGGGUUAAUCAUGG	AUGUGAUUGAUCCAGCGUUCUUGA	Translation	CDS=1-2088	cell division cycle 48C (CDC48C)
bna-miRC05_576	down	BnaC03g74060D	up	4	22.078	1	24	638	661	UUAAGAACUCCGGGUUAAUCAUGG	UUGUGGAUAACCCUGAGUUCUUCA	Translation	CDS=1-2247	acyl activating enzyme 16 (AAE16)
bna-miRC06_11485	up	BnaA08g00330D	up	3.5	12.536	1	23	192	214	GUUUCGGCUAAGAACUGUUUCUU	UCCAAACAGAUUUUAGCUGAGAA	Cleavage	CDS=1-207	unknown protein
bna-miRC06_8733	up	BnaA01g26770D	down	4.5	20.228	1	24	2051	2074	AUAUUCCGAUAAGAACUUCACUCU	GCGGUGGAGUUCUUGUGGCAAUAG	Cleavage	CDS=1-2421	embryo defective 1865 (EMB1865)
bna-miRC06_random_1509	up	BnaC01g30660D	up	4.5	11.978	1	24	316	339	AAGAACCGUCUGUUAACUUUUAAC	CUUAGAAGCUACCAGAUAGUUUUU	Cleavage	CDS=1-414	Cyclopropane-fatty-acyl-phospholipid synthase
bna-miRC07_13213	up	BnaA07g30580D	up	3.5	17.746	1	19	918	936	AUCCAAAUGAUCUAUCUGA	UCAGAUGGUUCAUUUGCGU	Translation	CDS=45-1115	Low PSII Accumulation 3 (LPA3)
bna-miRC07_17211	up	BnaA09g51710D	up	4	9.288	1	24	658	681	AAAAAGUUUGUUACGUUGGACGUG	AAGGUCCUACGUGGCAAGCUGUUU	Cleavage	CDS=351-2030	cytochrome P450, family 86, subfamily A, polypeptide 2 (CYP86A2)
bna-miRC07_17211	up	BnaCnng02380D	up	4	9.333	1	24	732	755	AAAAAGUUUGUUACGUUGGACGUG	AAGGUCCUACGUGGCAAGCUGUUU	Cleavage	CDS=425-2104	cytochrome P450, family 86, subfamily A, polypeptide 2 (CYP86A2)
bna-miRC08_19249	down	BnaA01g19110D	up	5	24.574	1	24	345	368	AACUUCCGCUAAGAACUCUACUCU	AUGGUAGGGUUCGUAGCGGCGAUU	Cleavage	CDS=42-617	EARLY LIGHT-INDUCIBLE PROTEIN 2 (ELIP2)
bna-miRC09_4734	down	BnaAnng25870D	up	4	17.307	1	20	606	625	UUAUAGGACUGGUCUAAACC	UUAUUGGACCAGUCCUACAA	Cleavage	CDS=29-997	NAD(P)-binding Rossmann-fold superfamily protein
bna-miRCnn_random_13491	down	BnaC09g23110D	down	3.5	16.379	1	22	25	46	CAUUAUCCCAUUCGAGUGACAA	UUCUUACCCGAGGGGGAUGAUG	Translation	CDS=1-384	#N/A
bna-miRCnn_random_78043	down	BnaA03g47290D	up	3	23.555	1	20	908	927	UGAAUGUCUUUCUCUUCAUC	GAUGAAGAUAAUGACAUUCU	Translation	CDS=375-1574	AT hook motif DNA-binding family protein
bna-miRCnn_random_83758	down	BnaC03g49360D	up	4.5	10.691	1	24	1199	1222	GUUAUUGGAGUUAAUAGAGAACCG	CUGUUUGCUAAUAACUUCAAAAAC	Cleavage	CDS=95-2350	ABC2 homolog 13 (ATH13)

## Sheet: CQ_H vs L_30ZS
Table S6. Differentially expressed and potential target genes for the DE miRNAs identified in CQ_H vs L_30ZS
CQ_H vs L_30ZS
miRNA_Acc.	miR_regulate	Target_Acc.	Tar_regulate	Expectation	UPE	miRNA_start	miRNA_end	Target_start	Target_end	miRNA_aligned_fragment	Target_aligned_fragment	Inhibition	Target_Desc.	Description
bna-miR156a	up	BnaC05g21280D	up	1.5	16.652	1	21	1199	1219	UGACAGAAGAGAGUGAGCACA	AGUGUUCUCUCUCUUCUGUCA	Cleavage	CDS=206-1309	squamosa promoter binding protein-like 10 (SPL10)
bna-miR156a	up	BnaA03g07990D	up	3.5	16.423	1	21	622	642	UGACAGAAGAGAGUGAGCACA	GUUGCUUGCUCUCUUGUGUUG	Cleavage	CDS=368-679	#N/A
bna-miR162a	up	BnaC02g08920D	up	4.5	15.471	1	21	2088	2108	UCGAUAAACCUGUGCAUCCAG	CCUUAUGUACAGGUUUGUAGA	Cleavage	CDS=1-2331	staurosporin and temperature sensitive 3-like A (STT3A)
bna-miR162a	up	BnaC03g06310D	up	4.5	16.101	1	21	725	745	UCGAUAAACCUGUGCAUCCAG	UUGGGUUCGUGGAUUUGUCGA	Translation	CDS=1-2067	Leucine-rich repeat protein kinase family protein
bna-miR167a	up	BnaC03g69200D	up	3.5	15.302	1	22	463	484	UGAAGCUGCCAGCAUGAUCUAA	AUGGGUCGUGCUGUCGGCUUCU	Translation	CDS=46-588	Peptidase S24/S26A/S26B/S26C family protein
bna-miR167a	up	BnaC02g03040D	up	3	19.53	1	22	858	878	UGAAGCUGCCAGCAUGAUCUAA	UGAGAUCAUGC-GGGAGCUUCA	Translation	CDS=1-1692	exocyst subunit exo70 family protein A1 (EXO70A1)
bna-miR167c	up	BnaC03g69200D	up	3.5	15.302	1	21	464	484	UGAAGCUGCCAGCAUGAUCUA	UGGGUCGUGCUGUCGGCUUCU	Translation	CDS=46-588	Peptidase S24/S26A/S26B/S26C family protein
bna-miR167c	up	BnaC02g03040D	up	3	19.53	1	21	859	878	UGAAGCUGCCAGCAUGAUCUA	GAGAUCAUGC-GGGAGCUUCA	Translation	CDS=1-1692	exocyst subunit exo70 family protein A1 (EXO70A1)
bna-miR169m	down	BnaC07g31240D	down	4.5	15.936	1	21	592	613	UGAGCCA-AAGAUGACUUGCCG	CGGCAACUUAUCUUGUGGCUCA	Cleavage	CDS=78-1010	ATG3
bna-miR169m	down	BnaC02g04730D	up	3	24.807	1	21	888	908	UGAGCCAAAGAUGACUUGCCG	UGGCAAGGCAGCUGUGGCUCA	Translation	CDS=1-1323	Aldolase-type TIM barrel family protein
bna-miR169m	down	BnaC03g69200D	up	4	17.107	1	21	428	448	UGAGCCAAAGAUGACUUGCCG	CUAAAGGUCAGCUUUGGCUUA	Translation	CDS=46-588	Peptidase S24/S26A/S26B/S26C family protein
bna-miR395a	down	BnaA07g38350D	down	4.5	21.373	1	21	1478	1498	CUGAAGUGUUUGGGGGAACUC	GGGUUUCUUCAAACACUUUCU	Cleavage	CDS=163-1974	PENTATRICOPEPTIDE REPEAT 596 (PPR596)
bna-miR396	up	BnaA06g21030D	down	4	16.334	1	21	1557	1577	UUCCACAGCUUUCUUGAACUU	AGGUUCGGGAAGGCAGUGGAU	Cleavage	CDS=655-1482	SER/ARG-rich protein 34A (SRp34a)
bna-miR396	up	BnaA01g33410D	down	4	15.521	1	21	804	824	UUCCACAGCUUUCUUGAACUU	AAGUUGGAGGGGGUUGUGGAG	Cleavage	CDS=72-899	Ribose 5-phosphate isomerase, type A protein
bna-miR396	up	BnaC03g63580D	up	3	17.984	1	21	403	423	UUCCACAGCUUUCUUGAACUU	GAGUUCAAGGCAGCUGUGAAA	Translation	CDS=1-870	Terpenoid cyclases/Protein prenyltransferases superfamily protein
bna-miRA01_10807	up	BnaC03g39170D	down	3.5	22.764	1	22	395	416	CUCGGACCAGGCUUCAUCCCCC	GGAAGAUGGAUCUUGGUUCGAG	Cleavage	CDS=76-660	indole-3-acetic acid inducible 19 (IAA19)
bna-miRA01_12750	up	BnaA05g32250D	down	4.5	18.195	1	24	263	286	CUGCUAUUGUAUGUGGUUUUCUGG	CCGGGAGAUUAGAGACAGUAGUAG	Translation	CDS=238-948	THO7
bna-miRA01_12750	up	BnaA05g01050D	up	4.5	12.311	1	24	247	270	CUGCUAUUGUAUGUGGUUUUCUGG	CGAGAAAGCCGUAUACGAUAACAA	Cleavage	CDS=207-1865	circadian clock associated 1 (CCA1)
bna-miRA02_20836	down	BnaC02g16480D	down	5	12.882	1	24	323	347	ACCG-GUUCUUAACUUUAACAAAGA	UUUCUGUUAAAUUUAAGGAUUCGGU	Cleavage	CDS=1-870	Uncharacterized conserved protein (DUF2358)
bna-miRA03_14738	down	BnaC03g68730D	down	3.5	13.924	1	24	847	870	ACUAAAUCUCUUGACUGUAACUGC	GGAGUUACAGGUGGGGGAUUUGGU	Cleavage	CDS=1-1497	unknown protein
bna-miRA03_14738	down	BnaC03g42180D	down	5	15.091	1	24	79	102	ACUAAAUCUCUUGACUGUAACUGC	AGAGUUAUUGUCAGGAGGUUAAGG	Cleavage	CDS=1-1356	DNAse I-like superfamily protein
bna-miRA03_512	down	BnaCnng67360D	down	3.5	11.402	1	22	718	739	GGGUCGACAUGAGAACACAUGG	CCUUAUGUUCUUAUGUCGUCCU	Cleavage	CDS=1-693	#N/A
bna-miRA03_random_4905	down	BnaAnng15210D	down	2.5	8.023	1	24	805	828	AAGAGACUGUAUCUUAUAUUAUGC	UUGUUAUAUAAAAUUCAGUCUUUU	Translation	CDS=353-556	#N/A
bna-miRA05_1135	down	BnaCnng10890D	down	4.5	22.655	1	23	1340	1362	GUCAAUUGAUGGGUAGUAGUUCA	GAAGCUACUGCUUGUUGGUUGGU	Cleavage	CDS=207-1364	PYRIMIDINE B (PYRB)
bna-miRA05_17950	down	BnaA07g38830D	up	4.5	20.377	1	23	821	843	UGGUGAUUUUAAAGCUGUAGAUA	UGUCUAUACUUUCAAAGUCACUG	Translation	CDS=61-993	similar to RCD one 3 (SRO3)
bna-miRA06_11335	down	BnaA03g07690D	up	5	10.882	1	24	1895	1918	AUGAACUUUGAAAAUUUUGAGAUU	AAGUUUAAAAUUUUCAAAGAUUUC	Cleavage	CDS=1431-1853	Nucleic acid-binding, OB-fold-like protein
bna-miRA06_28141	down	BnaA09g14070D	up	4	20.02	1	22	509	530	UUCUUGUGGUUGUAGAGUCUUG	AGAGGUUCUGCAACUCCGAGAA	Cleavage	CDS=1-942	glucan synthase-like 12 (GSL12)
bna-miRA06_3145	down	BnaA01g25330D	down	3.5	16.872	1	21	1103	1122	UCUGUAUGUGUGGGCUGAGUA	UGCUCAGUUCA-AUAUACAGA	Translation	CDS=81-1226	Pyridoxamine 5'-phosphate oxidase family protein
bna-miRA06_3145	down	BnaC03g77140D	down	4.5	20.943	1	21	120	140	UCUGUAUGUGUGGGCUGAGUA	UAAUCAGCCAACACGUGCAUA	Cleavage	CDS=1-870	cullin 2 (CUL2)
bna-miRA08_5509	up	BnaC03g64930D	up	3.5	24.06	1	21	534	554	AAAAGUUAAGGGACUCUACGC	GUGUUGAGUCUUUUGACUUUA	Cleavage	CDS=554-844	CONSTITUTIVE EXPRESSER OF PR GENES 30 (CPR30)
bna-miRA08_7338	up	BnaA07g07290D	down	4	18.52	1	24	596	619	AGUUAAAAGUUAAGGGACUCUACG	UACAGAGUCCCACGGUUUUUAAUU	Cleavage	CDS=1-1788	cleavage and polyadenylation specificity factor 30 (CPSF30)
bna-miRA09_20979	down	BnaC07g21300D	up	3	19.059	1	24	223	246	AAACUUGAAACGGUCUGGAUAACU	UUUGAUGAAGAUCGUUUCAGGUUU	Cleavage	CDS=1-876	#N/A
bna-miRA10_6053	up	BnaA09g36830D	up	5	22.78	1	22	59	80	UUGUGCUGGCUGUCGUUCCAUU	AAUGGAGCGAGAGCUUGUACAU	Cleavage	CDS=19-321	ribosomal protein L30 family protein
bna-miRA10_6053	up	BnaA05g07580D	up	5	15.815	1	22	664	685	UUGUGCUGGCUGUCGUUCCAUU	UAUGGAGUGGUAGUCAACACAU	Cleavage	CDS=1-1368	don-glucosyltransferase 1 (DOGT1)
bna-miRAnn_random_36421	down	BnaCnng42350D	up	5	15.895	1	21	136	157	UAAGC-UGCCAGCAUGAUCUUG	GAAGAUGGUGCUGGCAAGCUUG	Cleavage	CDS=488-808	BED zinc finger
bna-miRAnn_random_7722	down	BnaA07g20220D	up	5	14.322	1	24	1187	1210	ACUUGGUAAAACUGUAUAACUAGG	ACGGGUUAUACAGAUUUAUUAGAA	Translation	CDS=1-2385	WALL ASSOCIATED KINASE (WAK)-LIKE 10 (WAKL10)
bna-miRAnn_random_78447	up	BnaC02g08030D	up	5	16.073	1	21	820	840	UCGACGAUUUUCAUGAUUUCC	GGAAAUUAUGAAAAGCCUUGU	Cleavage	CDS=355-3492	Disease resistance protein (TIR-NBS-LRR class) family
bna-miRAnn_random_78447	up	BnaCnng29070D	up	4	15.077	1	21	430	450	UCGACGAUUUUCAUGAUUUCC	GGAGACUAUGAACAUUGUUGA	Translation	CDS=107-538	Ribosomal protein S19e family protein
bna-miRC01_random_606	up	BnaC04g28650D	up	5	21.371	1	22	69	90	UCAGGCAGACUGCUUCAUCUCA	UGAGAUGCAGAAGUCUGUGUGC	Cleavage	CDS=1-633	LOW EXPRESSION OF OSMOTICALLY RESPONSIVE GENES 2 (LOS2)
bna-miRC02_17420	up	BnaA08g09210D	down	4	15.887	1	24	2548	2571	AGAUGGGCUUCCAACUUAAAACUA	UGGUAUUAAACUGGAAGUCCAUUC	Cleavage	CDS=1-2109	nucleoside-triphosphatases
bna-miRC02_17420	up	BnaC07g04320D	up	5	17.276	1	24	1782	1805	AGAUGGGCUUCCAACUUAAAACUA	UGGUUUUGAGUUGAAAGCAUAACU	Translation	CDS=1186-1662	#N/A
bna-miRC02_58469	down	BnaC08g32430D	up	2.5	14.562	1	21	238	258	AAUCUCCCAUUAAACAUGCUC	UUGCAUGGUUAUUGGGGGAUU	Translation	CDS=1-579	xylosyltransferase 1 (XT1)
bna-miRC02_58469	down	BnaC02g13270D	up	5	16.197	1	21	978	999	AAUCUCCCAUU-AAACAUGCUC	GAGCGUUUUUGAAUGGGAGAGU	Translation	CDS=1-1080	Protein of unknown function (DUF295)
bna-miRC03_36967	up	BnaC06g37960D	down	4	19.793	1	22	1104	1125	UAGCCUGUCCUAUACGUUAAUG	AGUUGACGUGAGGGACACGCUA	Cleavage	CDS=1-1632	AMP-dependent synthetase and ligase family protein
bna-miRC03_90899	up	BnaC09g26400D	down	5	14.841	1	21	986	1007	UUUCUUAGG-GCGGGGUUCUUA	UAAGAAUUUUGCGCUUGAGAAA	Translation	CDS=375-1010	#N/A
bna-miRC03_90899	up	BnaA02g31800D	up	3.5	19.98	1	21	171	191	UUUCUUAGGGCGGGGUUCUUA	UGAUCAUCCCGCUUUAAGAAA	Cleavage	CDS=1-1236	Protein of Unknown Function (DUF239)
bna-miRC03_98	up	BnaAnng19160D	down	4.5	17.283	1	24	1194	1217	AACUUCCGCUAAGAACUUCAUUCU	GAAAUGGAGUUUUCGGCGUGAGUU	Translation	CDS=1-2937	#N/A
bna-miRC04_18172	down	BnaA01g00460D	up	3	12.979	1	22	1519	1540	AACUUGGUAAAACUGUAUAACU	GCUUAAAUAUUUUUGCCAAGUU	Cleavage	CDS=125-1711	BEST Arabidopsis thaliana protein match is: Calcium-binding EF hand family protein (TAIR:AT1G64850.1)
bna-miRC04_18172	down	BnaA01g00460D	up	5	14.519	1	22	1784	1805	AACUUGGUAAAACUGUAUAACU	UGUUAAAGAGUUUUACUAAAUA	Cleavage	CDS=125-1711	BEST Arabidopsis thaliana protein match is: Calcium-binding EF hand family protein (TAIR:AT1G64850.1)
bna-miRC04_18172	down	BnaA01g00460D	up	3	12.979	1	21	1520	1540	AACUUGGUAAAACUGUAUAAC	CUUAAAUAUUUUUGCCAAGUU	Cleavage	CDS=125-1711	BEST Arabidopsis thaliana protein match is: Calcium-binding EF hand family protein (TAIR:AT1G64850.1)
bna-miRC04_18172	down	BnaA01g00460D	up	5	14.519	1	21	1785	1805	AACUUGGUAAAACUGUAUAAC	GUUAAAGAGUUUUACUAAAUA	Cleavage	CDS=125-1711	BEST Arabidopsis thaliana protein match is: Calcium-binding EF hand family protein (TAIR:AT1G64850.1)
bna-miRC04_18172	down	BnaA01g00480D	up	3	16.961	1	21	895	915	AACUUGGUAAAACUGUAUAAC	CCUAAAUAUUUUUGCCAAGUU	Cleavage	CDS=1-1029	Putative endonuclease or glycosyl hydrolase
bna-miRC04_18172	down	BnaA03g07690D	up	3.5	11.241	1	21	538	558	AACUUGGUAAAACUGUAUAAC	AGUGUACAUUUUUACUAAUUU	Cleavage	CDS=1431-1853	Nucleic acid-binding, OB-fold-like protein
bna-miRC04_25528	up	BnaC09g32510D	up	4.5	21.289	1	24	673	696	CUAAGAACUCCACCCUGAGAACUU	UAAUUCUCAAAGUGGGGUUAUUGG	Cleavage	CDS=227-838	FASCIATED STEM 4 (FAS4)
bna-miRC04_34575	down	BnaA05g33160D	down	5	8.895	1	23	772	794	AAAACAAUCCGUCGUAGUCUAGC	GCAAGACUAAAAUGGAUUGUAUC	Cleavage	CDS=1-936	unknown protein
bna-miRC04_51556	down	BnaC05g18380D	down	3.5	16.517	1	24	277	300	UGUGAUUUUUAAGUUGGACCACCC	GUGAGGUCUAACUUGAGGGUUAUA	Cleavage	CDS=1-480	ATPase, AAA-type, CDC48 protein
bna-miRC05_15707	up	BnaA06g14090D	down	3.5	19.64	1	24	8	31	AUUCCGCUUAGAACCUCCAUCCUA	UUCAAUUGAGGUUCUCAGCGGAGA	Translation	CDS=1-747	auxin response factor 2 (ARF2)
bna-miRC05_33254	down	BnaC03g46120D	down	4	16.402	1	24	1883	1906	AAUUAGACGACUUAGUAGAAGACU	UUAGUUCUAUUGAGUCGUCUGAAG	Cleavage	CDS=1-2088	cell division cycle 48C (CDC48C)
bna-miRC05_33254	down	BnaA06g29750D	down	4.5	12.855	1	24	646	670	AAUUAGACGAC-UUAGUAGAAGACU	AUUCUACUAUUAAAGUUGUCUGAUU	Translation	CDS=272-514	Expressed protein
bna-miRC05_39084	down	BnaC09g21260D	down	4.5	17.365	1	22	764	785	UUAUAGGUUGUCGGUUUUGAUU	AAUCGAAGAUGAGAGCUUAUAA	Translation	CDS=349-1404	indole-3-acetic acid inducible 9 (IAA9)
bna-miRC06_3193	down	BnaC03g42180D	down	4.5	11.151	1	21	1241	1261	GCAAGUUGACUUUGGCUCUGU	AUAUAGUCAAAGUCGACUUAG	Cleavage	CDS=1-1356	DNAse I-like superfamily protein
bna-miRC06_3193	down	BnaCnng27470D	down	3.5	14.908	1	21	389	409	GCAAGUUGACUUUGGCUCUGU	AUAAAGCCAAACUCAACUUCC	Translation	CDS=1-738	ethylene-responsive element binding protein (EBP)
bna-miRC06_3193	down	BnaA05g36440D	down	3.5	14.675	1	21	908	928	GCAAGUUGACUUUGGCUCUGU	GCAGAGCUCAAAUUAGCUUGC	Translation	CDS=1-1620	Eukaryotic aspartyl protease family protein
bna-miRC06_42087	up	BnaC05g50740D	up	4.5	17.579	1	24	974	997	CUGUUUCCUCGGAAAAGCCUCAGA	UUUGGGGUUUUUCUAAAGAAAUAU	Translation	CDS=1640-1903	#N/A
bna-miRC06_5157	up	BnaC07g35100D	down	4.5	20.364	1	21	379	399	CAUCCAGCUGGAAGACUUUCU	AGAGAGCUUCUCAGCUGGAUA	Cleavage	CDS=48-449	Ribosomal protein L32e
bna-miRC07_1329	up	BnaC04g27680D	down	5	17.016	1	24	46	69	AUAAAUGUUUAGAACUCCAAUGGG	CCAAUUGGAGAUCUAAACACAUAC	Cleavage	CDS=1-549	#N/A
bna-miRC07_26305	down	BnaC08g08220D	up	4.5	13.694	1	24	1598	1622	AAUCUGUGUGCAUAAACU-UAAAAC	UUUUUAUGGUUUAUGCACACAAGUU	Cleavage	CDS=65-1540	ZPR1 zinc-finger domain protein
bna-miRC08_14811	up	BnaA08g09210D	down	4.5	24.895	1	22	401	422	AUUUUGCCUACUCCUCCCAUAC	GUAUGCCAGGAAUAGGCAAGAC	Translation	CDS=1-2109	nucleoside-triphosphatases
bna-miRCnn_random_159179	down	BnaA08g03460D	down	5	22.927	1	24	946	969	AUCCGGAGUUUUUAGAGUGAGAUU	AAGCUUGCUCUAGAAGCUCUUGAA	Cleavage	CDS=877-1443	embryo defective 2191 (emb2191)

## Sheet: YN_H vs L_30ZS
Table S6. Differentially expressed and potential target genes for the DE miRNAs identified in YN_H vs L_30ZS
YN_H vs L_30ZS
miRNA_Acc.	miR_regulate	Target_Acc.	Tar_regulate	Expectation	UPE	miRNA_start	miRNA_end	Target_start	Target_end	miRNA_aligned_fragment	Target_aligned_fragment	Inhibition	Target_Desc.	Description
bna-miR396	up	BnaA06g21030D	down	4	16.334	1	21	1557	1577	UUCCACAGCUUUCUUGAACUU	AGGUUCGGGAAGGCAGUGGAU	Cleavage	CDS=655-1482	SER/ARG-rich protein 34A (SRp34a)
bna-miR396	up	BnaA01g33410D	down	4	15.521	1	21	804	824	UUCCACAGCUUUCUUGAACUU	AAGUUGGAGGGGGUUGUGGAG	Cleavage	CDS=72-899	Ribose 5-phosphate isomerase, type A protein
bna-miRA03_14738	down	BnaC03g68730D	down	3.5	13.924	1	24	847	870	ACUAAAUCUCUUGACUGUAACUGC	GGAGUUACAGGUGGGGGAUUUGGU	Cleavage	CDS=1-1497	unknown protein
bna-miRA03_14738	down	BnaC03g42180D	down	5	15.091	1	24	79	102	ACUAAAUCUCUUGACUGUAACUGC	AGAGUUAUUGUCAGGAGGUUAAGG	Cleavage	CDS=1-1356	DNAse I-like superfamily protein
bna-miRC09_891	down	BnaA03g50790D	down	5	14.052	1	24	11	34	AGGACGUCUCUUAAAUAAAAGAUA	UUUUUUUUCUUUAAGAGACGUAGA	Cleavage	CDS=87-710	FUNCTIONS IN: molecular_function unknown
bna-miR156a	up	BnaA03g07990D	up	3.5	16.423	1	21	622	642	UGACAGAAGAGAGUGAGCACA	GUUGCUUGCUCUCUUGUGUUG	Cleavage	CDS=368-679	#N/A
bna-miR167a	up	BnaC03g69200D	up	3.5	15.302	1	22	463	484	UGAAGCUGCCAGCAUGAUCUAA	AUGGGUCGUGCUGUCGGCUUCU	Translation	CDS=46-588	Peptidase S24/S26A/S26B/S26C family protein
bna-miR167c	up	BnaC03g69200D	up	3.5	15.302	1	21	464	484	UGAAGCUGCCAGCAUGAUCUA	UGGGUCGUGCUGUCGGCUUCU	Translation	CDS=46-588	Peptidase S24/S26A/S26B/S26C family protein
bna-miR396	up	BnaC03g63580D	up	3	17.984	1	21	403	423	UUCCACAGCUUUCUUGAACUU	GAGUUCAAGGCAGCUGUGAAA	Translation	CDS=1-870	Terpenoid cyclases/Protein prenyltransferases superfamily protein
bna-miRA01_12750	up	BnaC03g00040D	up	3.5	11.221	1	24	394	417	CUGCUAUUGUAUGUGGUUUUCUGG	CAAGAAAGCCAUAUACAAUAACAA	Cleavage	CDS=345-2048	LATE ELONGATED HYPOCOTYL (LHY)
bna-miRA01_12750	up	BnaAnng17890D	up	4	12.338	1	24	368	391	CUGCUAUUGUAUGUGGUUUUCUGG	CAAGAAAGCCAUAUACAAUAACGA	Cleavage	CDS=319-2079	LATE ELONGATED HYPOCOTYL (LHY)
bna-miRA01_12750	up	BnaA05g01050D	up	4.5	12.311	1	24	247	270	CUGCUAUUGUAUGUGGUUUUCUGG	CGAGAAAGCCGUAUACGAUAACAA	Cleavage	CDS=207-1865	circadian clock associated 1 (CCA1)
bna-miRA07_4294	up	BnaA05g23530D	up	3.5	13.381	1	21	1003	1023	GAUCCUCUGAACACUUCAUUG	UAAUGGGAUGUUUAGAGGAUG	Cleavage	CDS=92-1066	N-terminal nucleophile aminohydrolases (Ntn hydrolases) superfamily protein
bna-miRA07_4294	up	BnaC02g01440D	up	4.5	22.218	1	21	513	533	GAUCCUCUGAACACUUCAUUG	AGAUGGAGUGUUCAUAGGACU	Cleavage	CDS=1-1236	HXXXD-type acyl-transferase family protein
bna-miRA07_random_28	up	BnaA03g32230D	up	5	16.887	1	20	630	649	CCUACUCUCGUCAAUUGACU	AGUUAACUGAUGAGACAAGG	Cleavage	CDS=110-907	unknown protein
bna-miRA09_21724	up	BnaCnng45420D	up	4	15.483	1	21	587	607	GAAUGUUGUCUGGACCGAGGA	UCUUCGGUUCUGACGAGAUUC	Translation	CDS=1-924	#N/A
bna-miRC01_13283	up	BnaC03g63540D	up	3	20.118	1	24	1435	1458	AUAUUCCGAUAAGAACCUCACUCU	UAGCUGAGGUGGUUAUCGGAGUGU	Cleavage	CDS=93-1892	Terpenoid cyclases/Protein prenyltransferases superfamily protein
bna-miRC01_random_606	up	BnaA03g19650D	up	3.5	18.985	1	22	81	102	UCAGGCAGACUGCUUCAUCUCA	GGAGAUGAAGAAGAUUGCCUGU	Translation	CDS=79-264	BEST Arabidopsis thaliana protein match is: arabinogalactan protein 23 (TAIR:AT3G57690.1)
bna-miRC01_random_606	up	BnaAnng29440D	up	3.5	17.555	1	22	1167	1187	UCAGGCAGACUGCUUCAUCUCA	GGAGAUGGAG-GGUCUGUCUGA	Cleavage	CDS=1315-1557	#N/A
bna-miRC02_22080	up	BnaA09g54250D	up	4	17.999	1	21	905	925	UCAAUGUUGGCUCAAUUAUGU	CUGUAAUUGAGCGAACAUUUG	Translation	CDS=1-3147	SHOOT GRAVITROPISM 2 (SGR2)
bna-miRA08_4088	down	BnaA02g10400D	up	5	6.195	1	24	266	289	AAUAGUGAGCUCUUGAUUUGUAAG	UUUAUAAAUUAAUUGCUUAUUCUU	Translation	CDS=572-1351	Nodulin MtN3 family protein
bna-miRC02_25029	down	BnaA07g35800D	up	4	22.98	1	24	199	222	AUUAGGUGCUCUAGAAUUCUUAGA	CCCGAGGACUUUAGGGCACCUGAG	Cleavage	CDS=52-822	phloem protein 2-B11 (PP2-B11)
bna-miRC04_8502	down	BnaC03g78030D	up	2.5	22.423	1	19	738	756	AAUUUUUGUGGAACCUCGU	AAGAGGUUCCACAGGAGUU	Cleavage	CDS=95-1282	myrosinase-binding protein 2 (MBP2)
